# Supplementary material
Source: publisher figshare collection journal article supplement (https://karger.figshare.com/ndownloader/files/22232706)
Supplement: Supplementary file 1 [file 22232706]

|  | Model 1 | Model 2 | Model 3 |
| --- | --- | --- | --- |
| Coef. (95% Conf. Interval) | Coef. (95% Conf. Interval) | Coef. (95% Conf. Interval) |
| Age at B2  N= 472 | -0.63 (-0.92; -0.34) | -0.62 (-0.92; -0.32) | -0.44 (-0.77; -0.10) |
| Age at B4  N= 452 | -0.40 (-0.58; -0.21) | -0.40 (-0.59; -0.21) | -0.30 (-0.50; -0.09) |
| Age at pubarche N= 482 | -0.53 (-0.73; -0.33) | -0.54 (-0.74; -0.33) | -0.49 (-0.71; -0.26) |
| Age at menarche  N= 489 | -0.47 (-0.68; -0.27) | -0.46 (-0.67; -0.25) | -0.36 (-0.58; -0.13) |
| Time B2-menarche  N= 463 | 0.15 (-0.11; 0.40) | 0.18 (-0.08; 0.44) | 0.09 (-0.20; 0.38) |
| Ovarian volume  N= 367 | -0.16 (-0.92; 0.59) | -0.18 (-0.95; 0.60) | -0.55 (-1.34; 0.23) |

Supplemental Table 1: Linear regression analysis between DHEAS levels around 7 years of age and pubertal timing and ovarian volume in girls participating in the Growth and Obesity Chilean Cohort study (GOCS). (Model 1 adjusted for age and BMI SDS around 7 years of age. Model 2 adjusted for model 1 + birthweight SDS. Model 3 adjusted for model 2 + mother’s age at menarche)

(B2: Breast Tanner 2; B4: Breast Tanner 4, SDS: standard deviation scores)
